# Supplementary material for: Nationwide Screening Practices for Tamoxifen Retinal Toxicity in South Korea: A Population-Based Cohort Study
Source: MDPI journal article supplement (doi:10.3390/jcm13082167), 2024-04-09
Supplement: s1 [file s1]

### Supplementary Figure

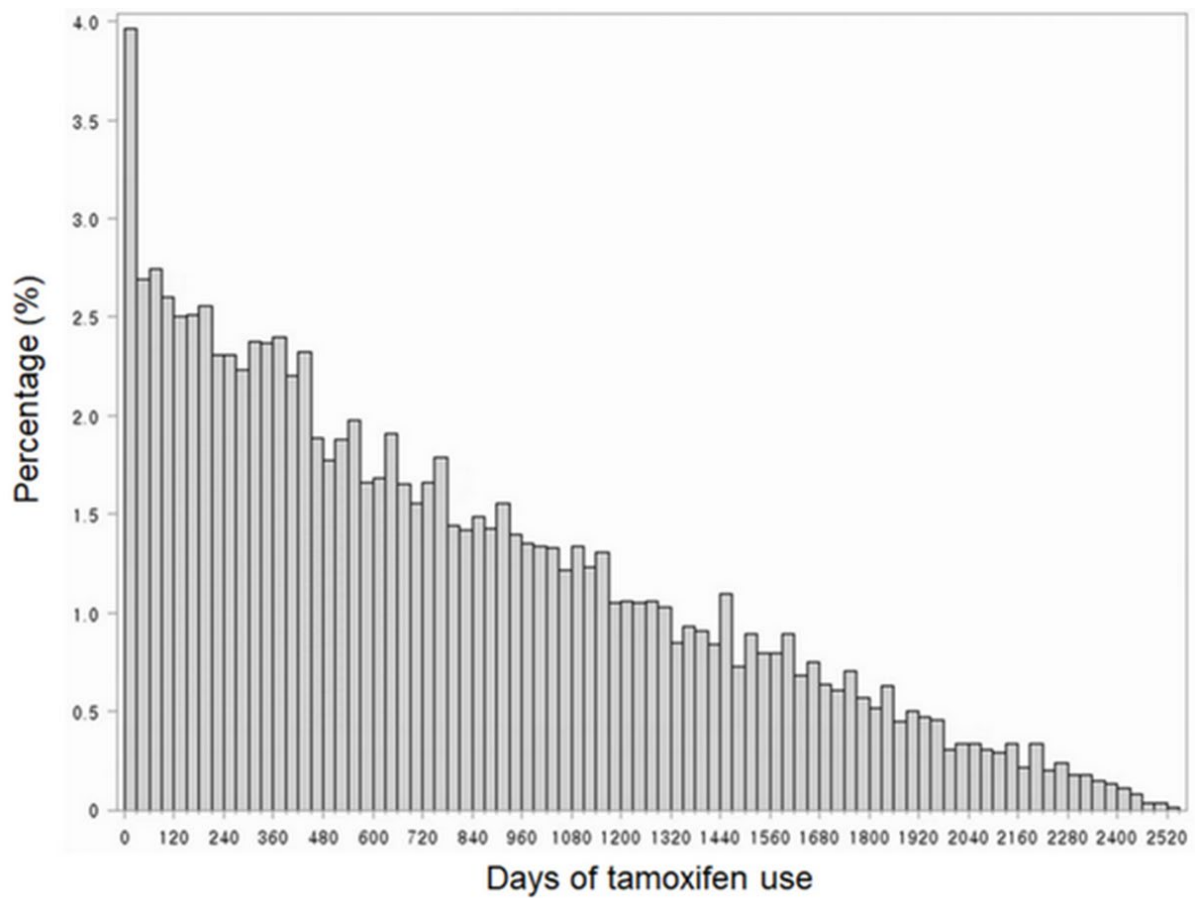

**Supplementary Figure S1.** Timing of Baseline Screening for Tamoxifen Retinopathy. The figure illustrates the timing of baseline screening for tamoxifen retinopathy, presented as the interval from the start date of tamoxifen treatment.

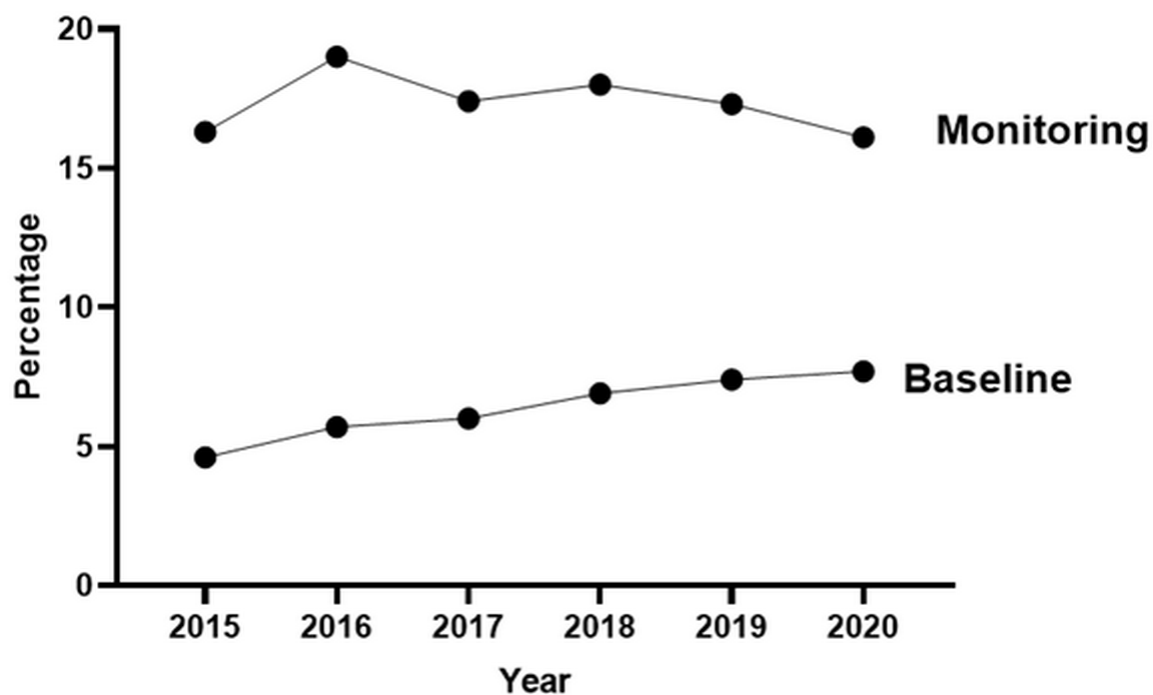

**Supplementary Figure S2.** Proportion of patients receiving baseline screening within 1 year of tamoxifen use and that of those with subsequent monitoring (within 1 year from the baseline examination) among those with baseline screening in each year between 2015 and 2020
